# Supplementary material
Source: publisher figshare collection journal article supplement (https://gsapubs.figshare.com/articles/dataset/_/12533093)
Supplement: Supplementary file 1 [file 1]

**Data Repository Item 2015376**

File 1. Details of methods used in this study of the paleoseismic record from Ahuriri Inlet, Hawkes Bay, New Zealand.

File 2. Site data for Holocene cores from Ahuriri Inlet, Hawkes Bay, New Zealand.

File 3. Foraminiferal census counts, relative abundances and modern analogue technique elevation estimates for samples from Holocene cores from Ahuriri Inlet, Hawkes Bay, New Zealand.

File 4. Relative abundances of foraminiferal species in 1010 modern intertidal and inner shelf samples from around New Zealand, including 692 from sheltered estuaries and harbours) used in the modern analogue technique estimates of paleo-elevation of Holocene samples from Ahuriri Inlet cores.

File 5. Sources of modern analogue samples from around New Zealand used in estimating paleoelevations of Holocene foraminiferal faunas from Ahuriri Inlet cores.

File 6. Table of ages determined by radiocarbon and tephra dating of samples from Holocene cores from Ahuriri Inlet, Hawkes Bay, New Zealand.

File 7. Major element analyses of individual glass shards from eight tephra layers in Ahuriri Inlet cores, Hawkes Bay, New Zealand. Analyses were undertaken by ASP using a JEOL 733 Electron Microprobe.

File 8. Workings for the calculation of Land Elevation Records for selected Holocene cores, Ahuriri Inlet, Hawkes Bay, New Zealand.
